# Supplementary material for: Adjuvant treatment and molecular mechanism of probiotic compounds in patients with gastric cancer after gastrectomy
Source: Royal Society of Chemistry journal article supplement (doi:10.1039/d1fo01375k), 2021-01-01

**Fig. S1 Precancerous lesion of GC (PLGC) and gastrectomy modeling in SD rats.** (A) Changes of rats' weight during PLGC modeling. (B) HE staining was used to observe the damage of gastric tissue in rats ( $\times 200$ ,  $\times 400$ , magnification). C: control group, PLGC group: precancerous lesion gastric cancer model. \*\*  $P < 0.01$ .

**Fig. S1 Precancerous lesion of GC (PLGC) and gastrectomy modeling in SD rats.**

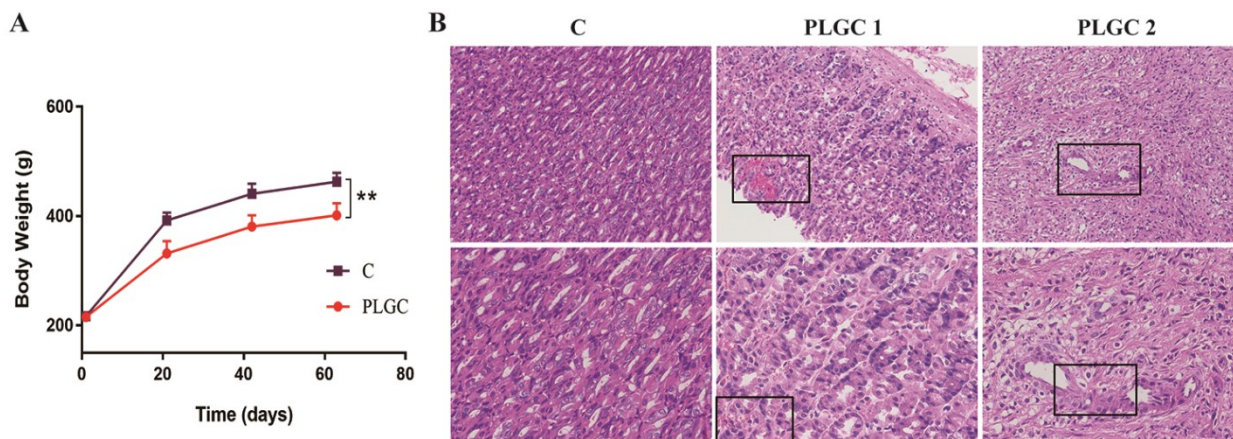

Supplement: d1fo01375k1.pdf [file d1fo01375k1.pdf]
